# Supplementary material for: Oxidative dehydrogenation of thiols to disulfides at room temperature using silica supported iron oxide as an efficient solid catalyst
Source: Royal Society of Chemistry journal article supplement (doi:10.1039/c6ra19832e), 2016-01-01

## Electronic Supplementary Information

**Title:** Oxidative dehydrogenation of thiols to disulfides at room temperature using silica supported iron oxide as an efficient solid catalyst

Susmita Paul<sup>\*a</sup> and S. M. Islam<sup>\*b</sup>

*Department of Chemistry, University of Kalyani, Kalyani, Nadia, 741235, West Bengal, India*

Email: [susmitapaul2007@rediffmail.com](mailto:susmitapaul2007@rediffmail.com); [manir65@rediffmail.com](mailto:manir65@rediffmail.com)

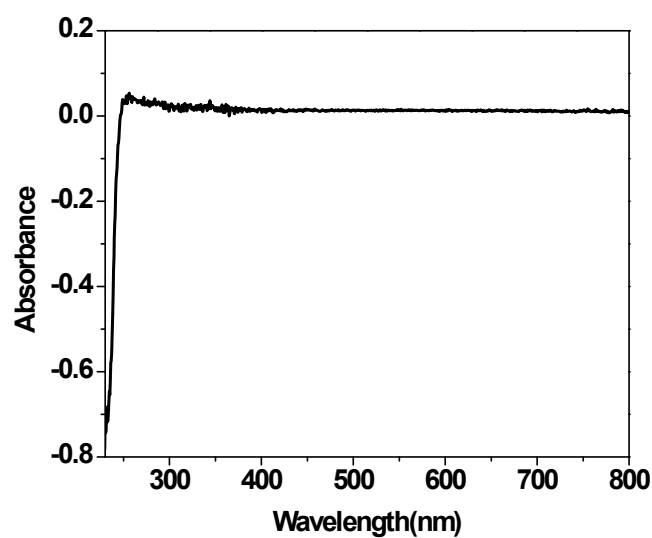

Figure 1.a; DRS-UV analysis of silica gel G.

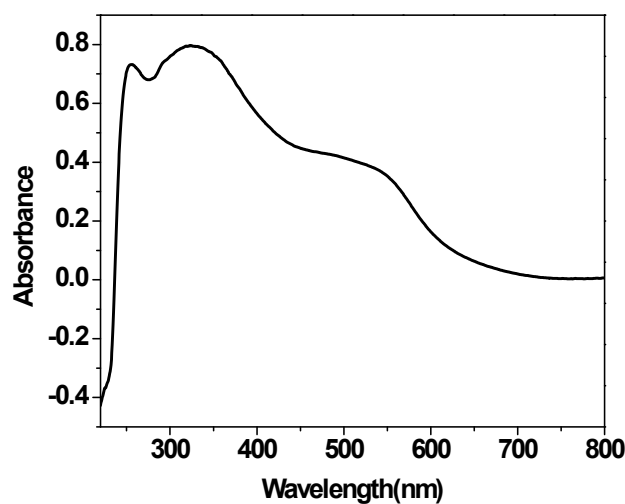

Figure 1.b; DRS-UV analysis of Catalyst B.

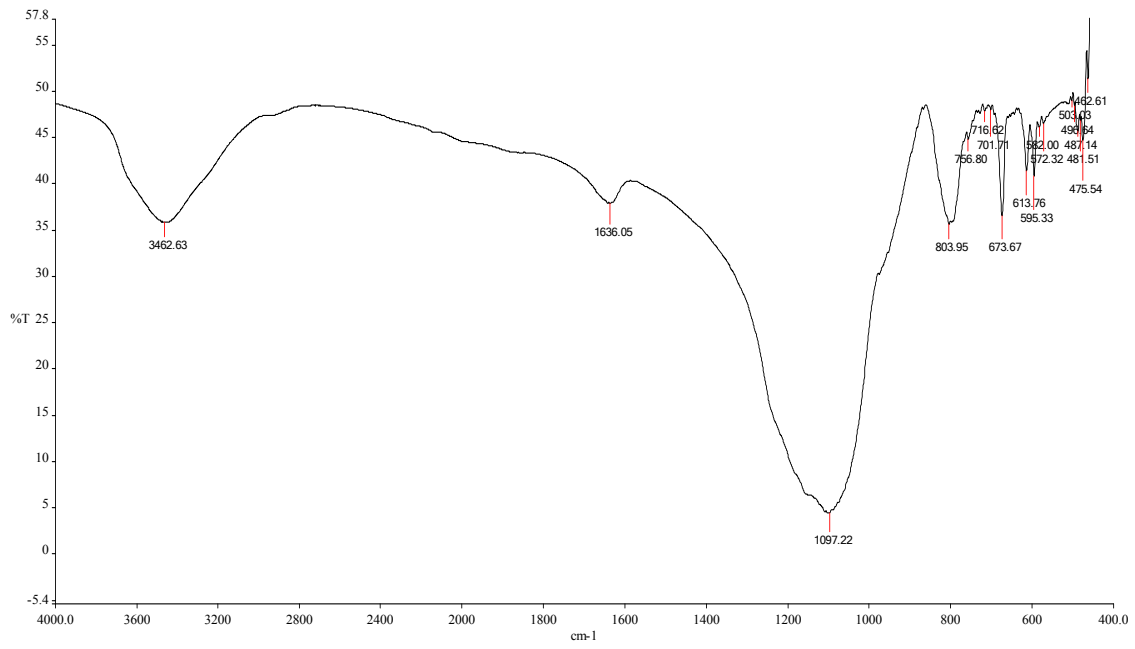

Figure 2.a; FT-IR analysis of silica gel G.

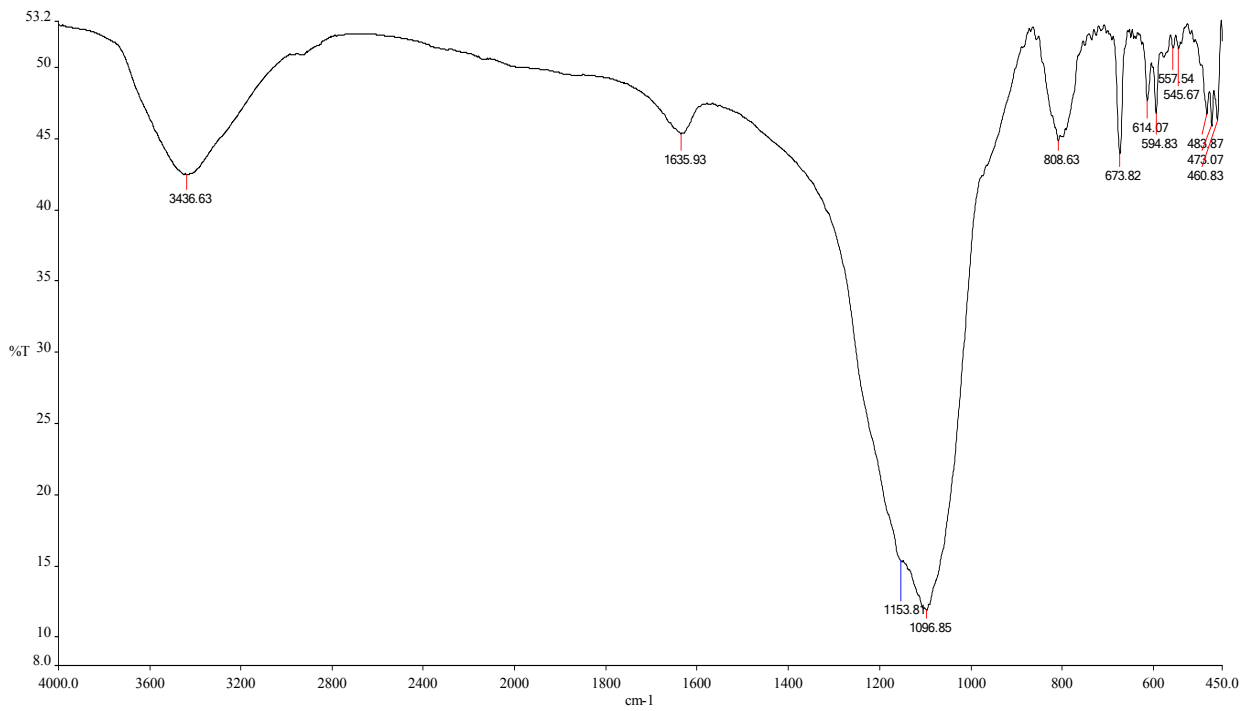

Figure 2.b; FT-IR analysis of Catalyst B

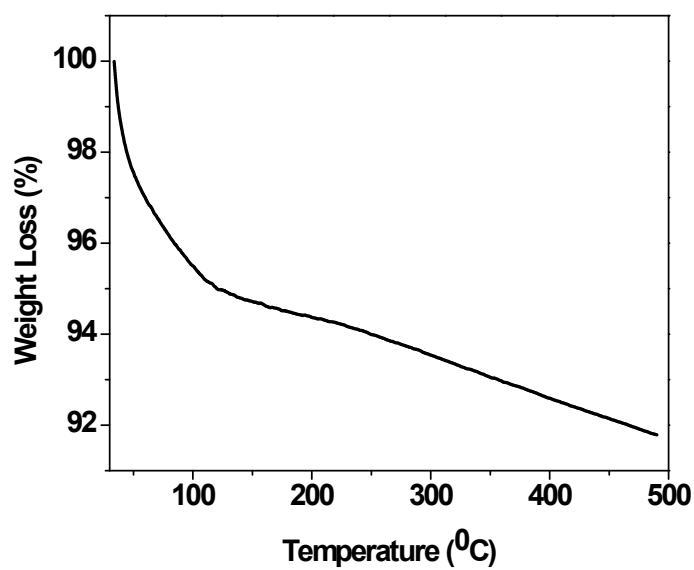

Figure 3.a; TG/DTA analysis of silica gel G.

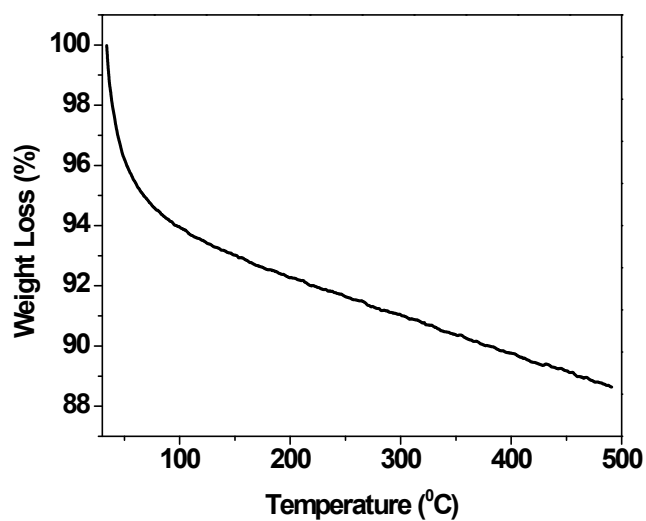

Figure 3.b; TG/DTA analysis of Catalyst B.

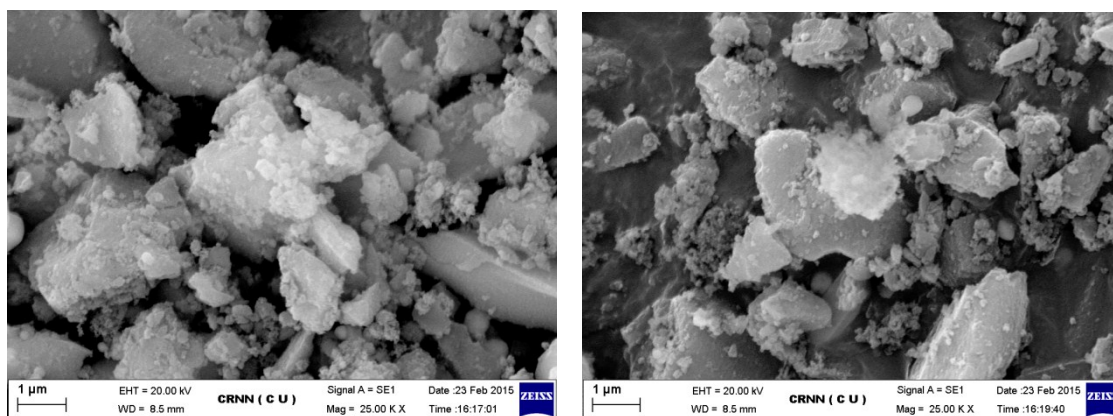

Figure 4. SEM analysis of Catalyst B

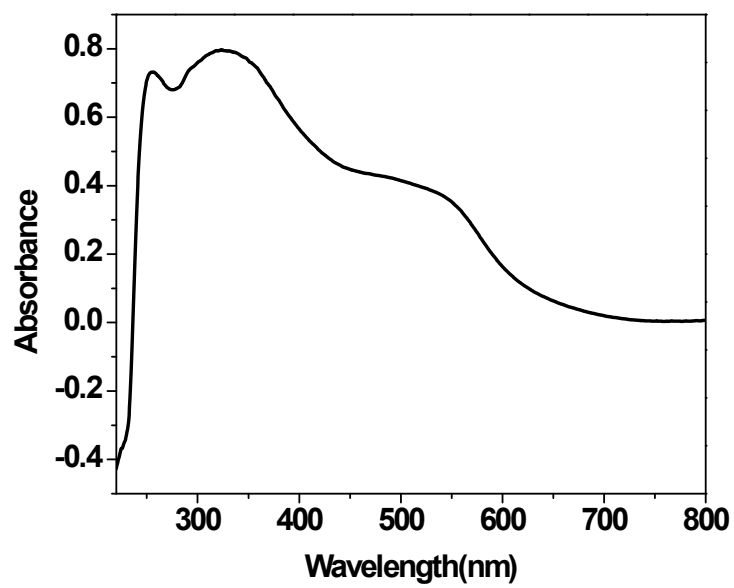

Figure 5a. DRS-UV analysis of Catalyst B after sixth cycle.

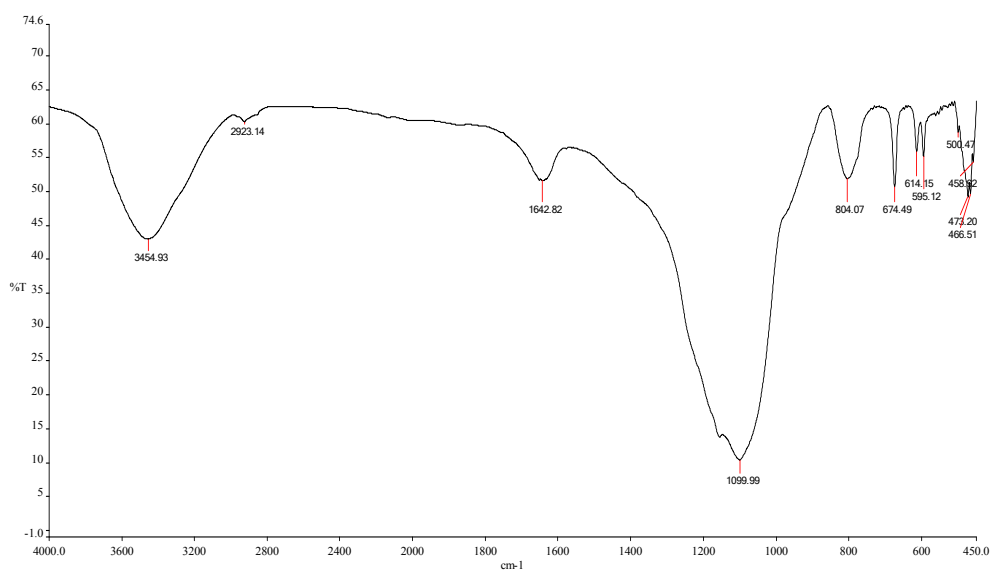

Figure 5.b; FT-IR analysis of Catalyst B after six recycle run.

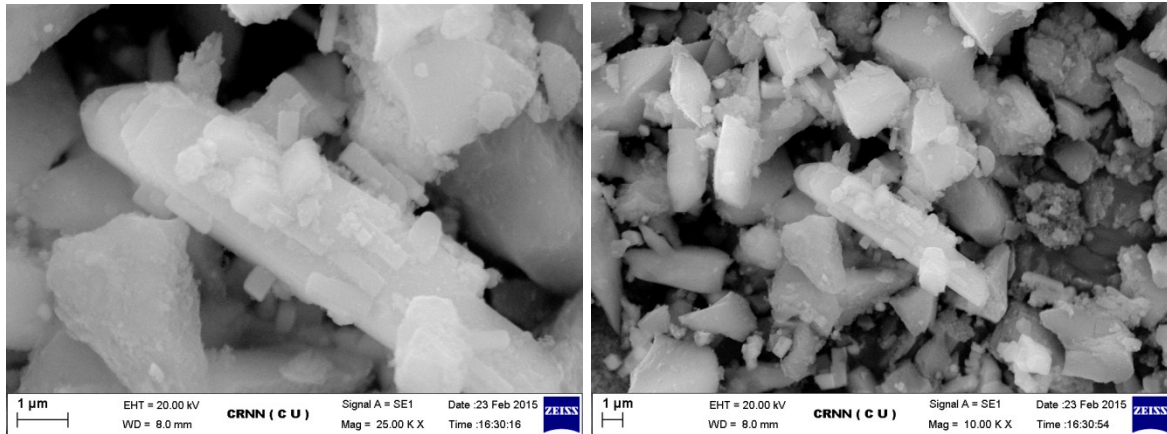

Figure 5. SEM analysis of Catalyst B,  $\text{Fe}_2\text{O}_3@\text{SiO}_2$  after sixth cycle.

EDX of  $\text{Fe}_2\text{O}_3@\text{SiO}_2$ , Catalyst B

Spectrum processing :

Peak possibly omitted : 9.709 keV

Processing option : All elements analyzed (Normalised)

Number of iterations = 4

Standard :

O SiO2 1-Jun-1999 12:00 AM

Si SiO2 1-Jun-1999 12:00 AM

S FeS2 1-Jun-1999 12:00 AM

Ca Wollastonite 1-Jun-1999 12:00 AM

Fe Fe 1-Jun-1999 12:00 AM

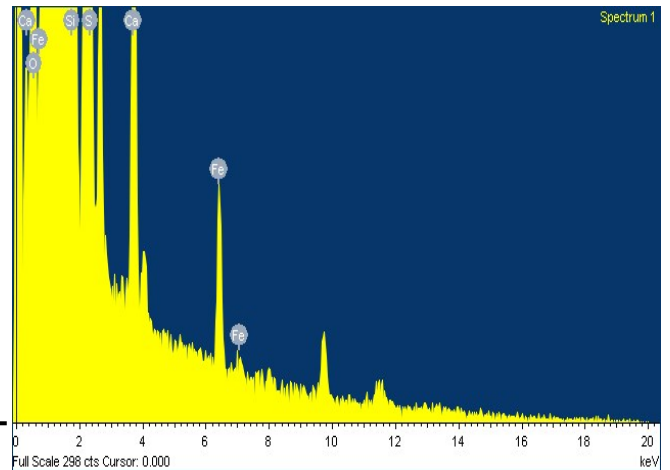

| Element | Weight% | Atomic% |
|---------|---------|---------|
| O K     | 51.99   | 67.04   |
| Si K    | 38.17   | 28.04   |
| S K     | 2.56    | 1.65    |
| Ca K    | 4.04    | 2.08    |
| Fe K    | 3.25    | 1.20    |
| Totals  | 100.00  |         |

Scanned 1H and 13C NMR spectral data of selected disulfides:

Table 3; Entry 1

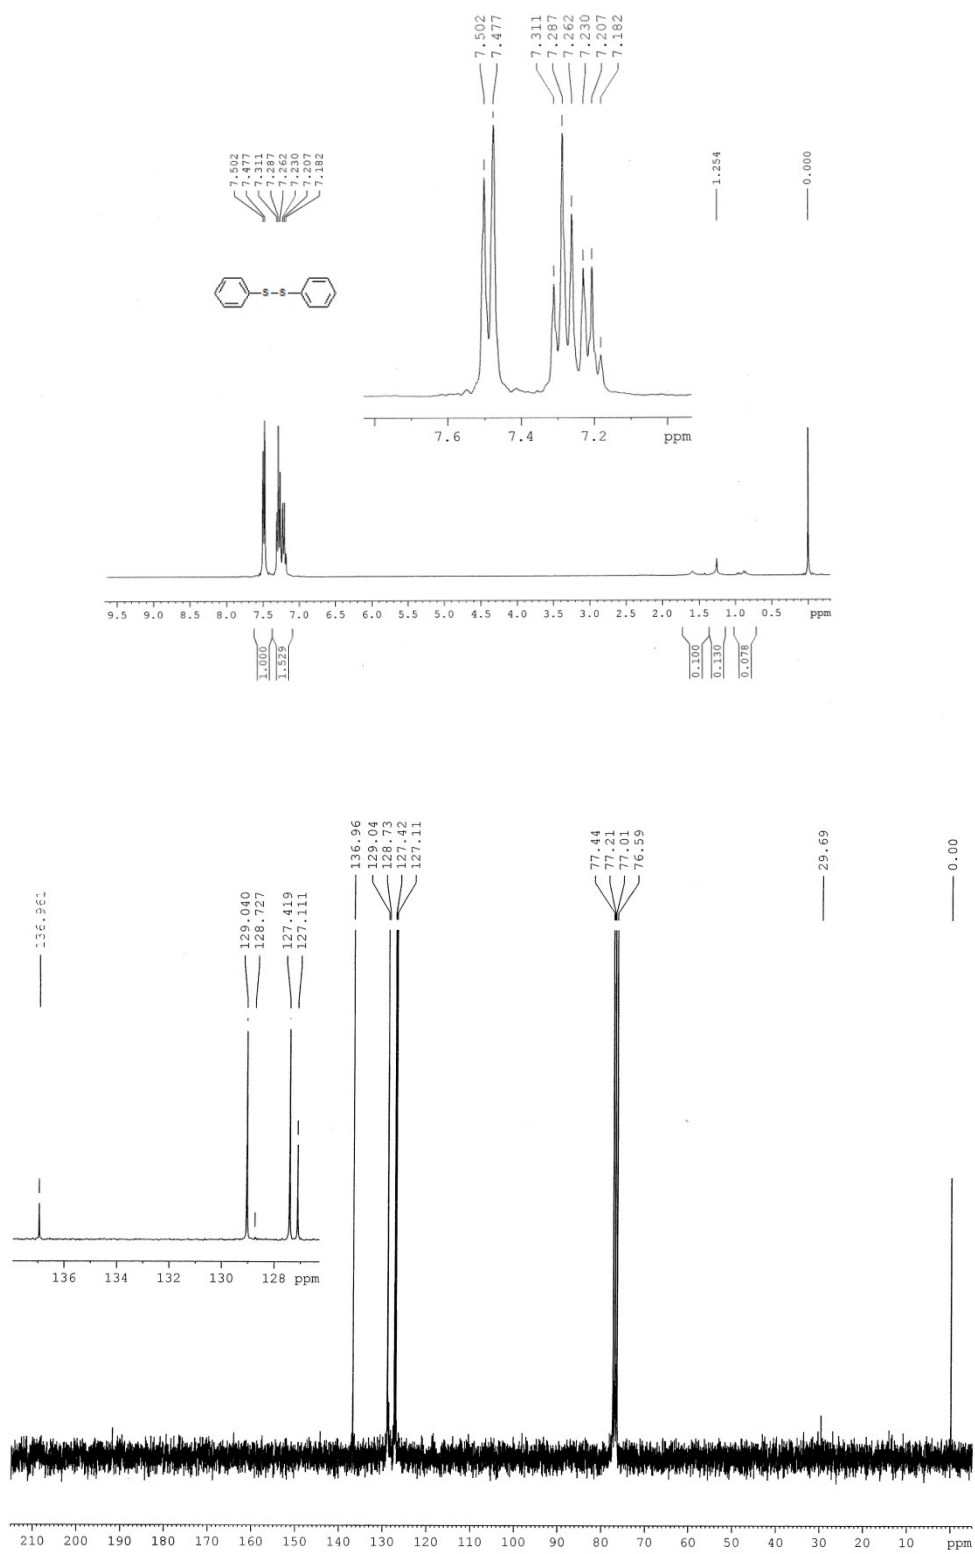

Table 3; Entry 2

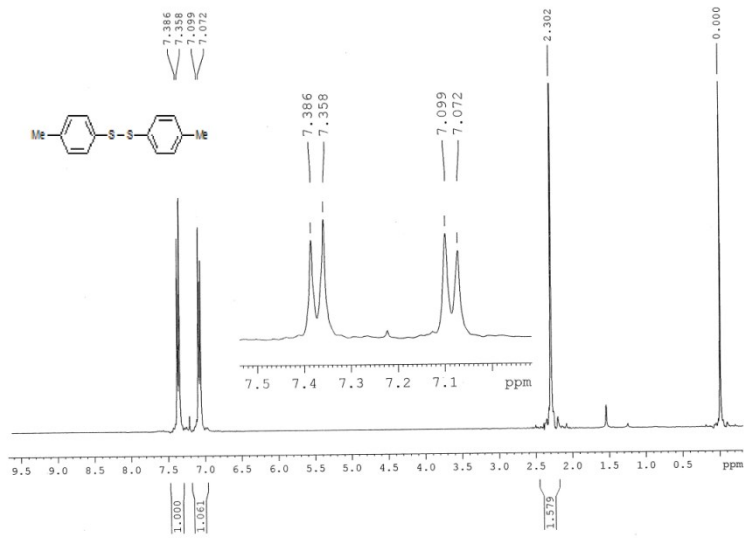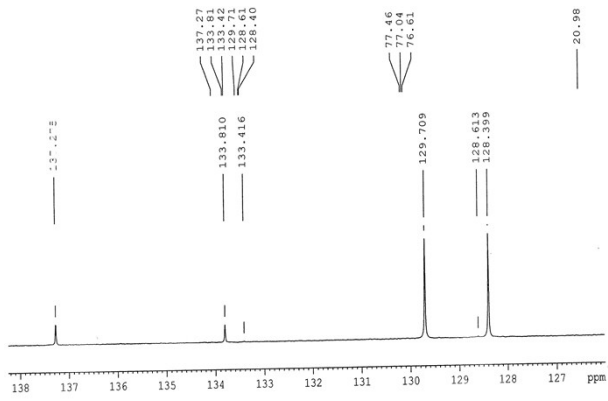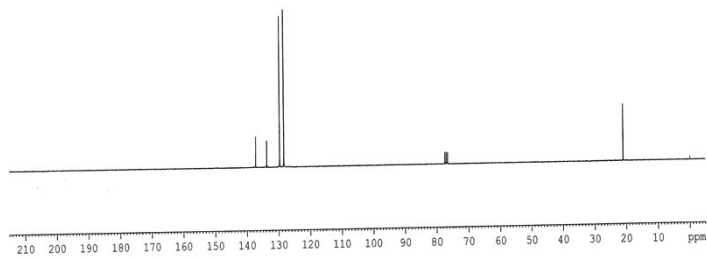

Table3; Entry 3

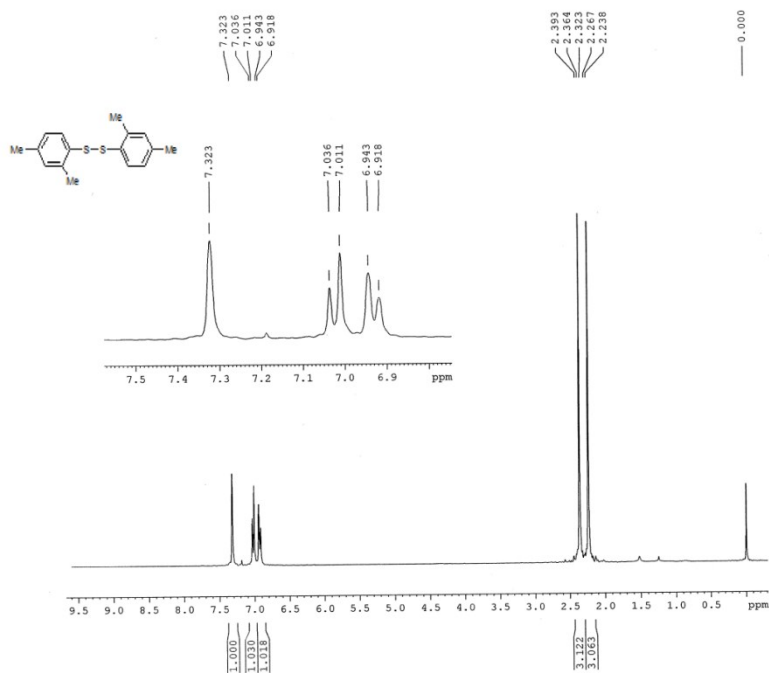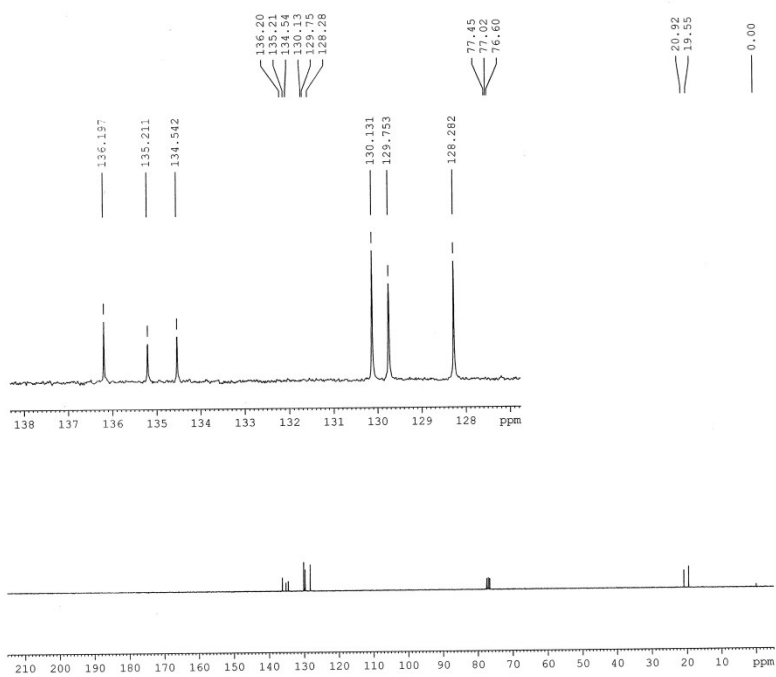





Table 3; Entry 5

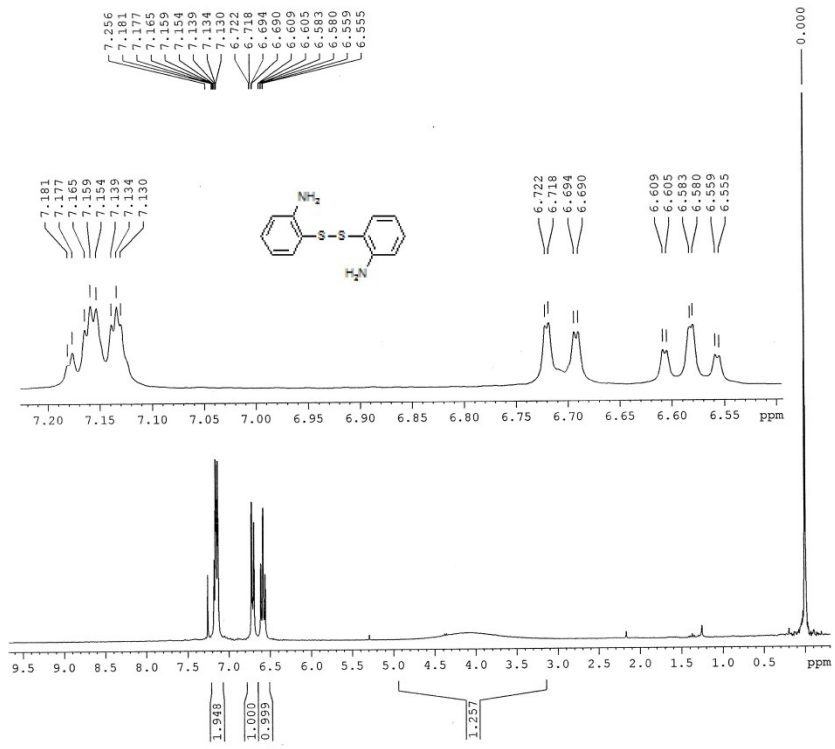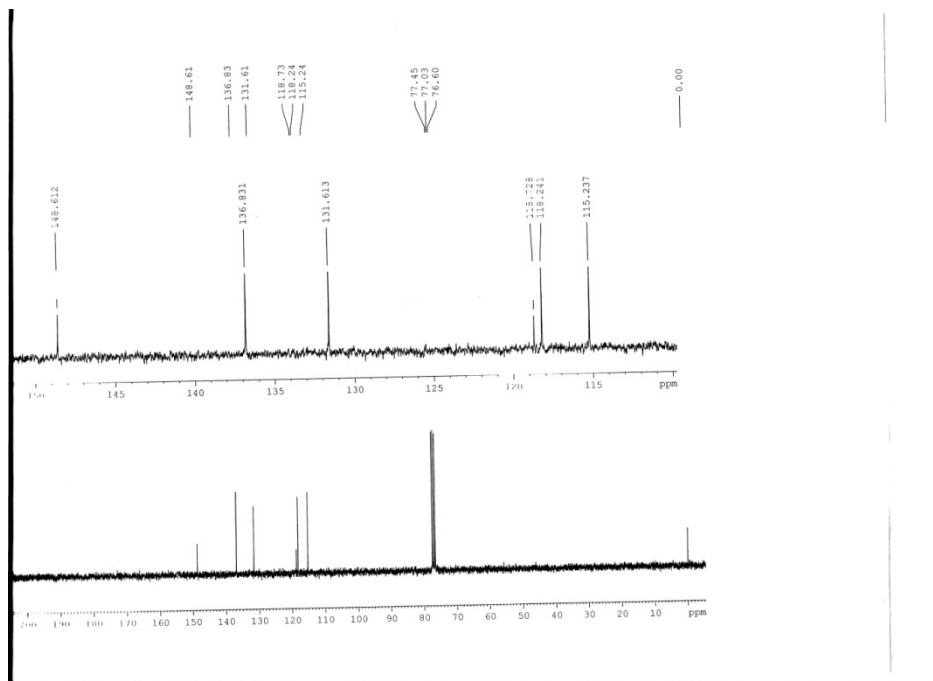

Table 3; Entry 6

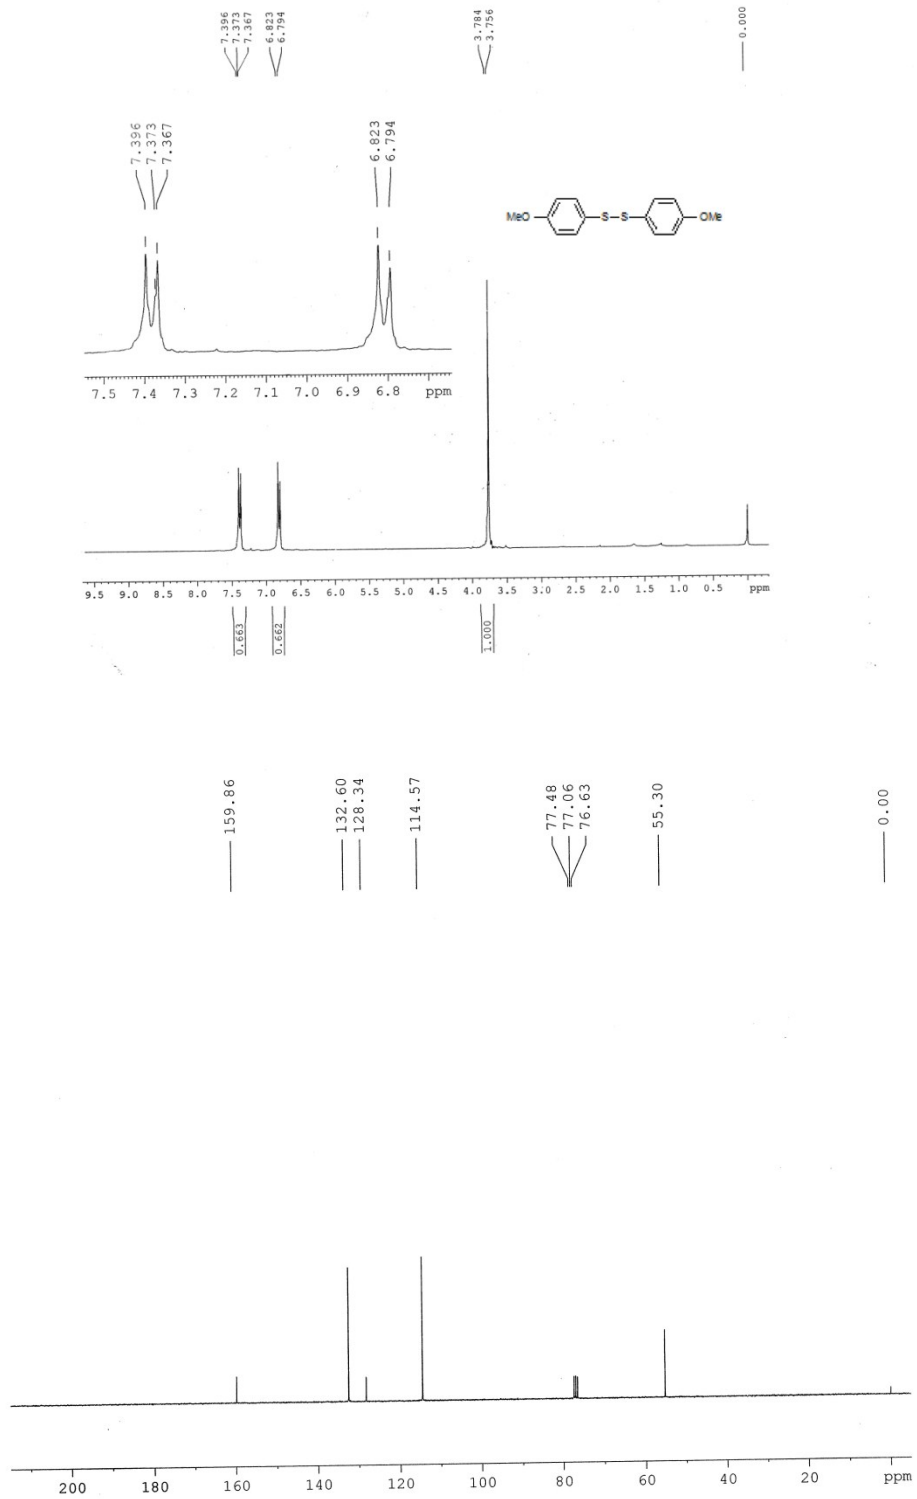

Table 3; Entry 7

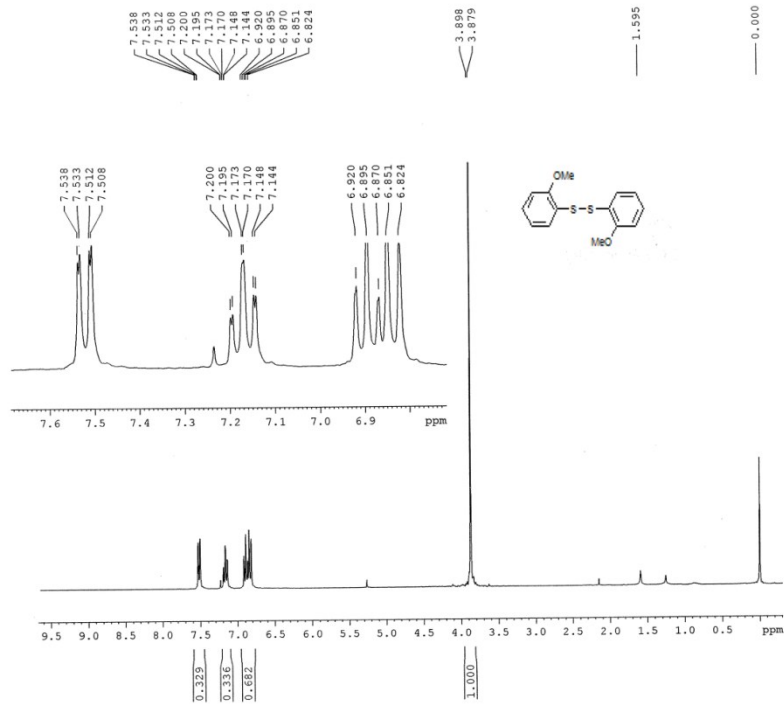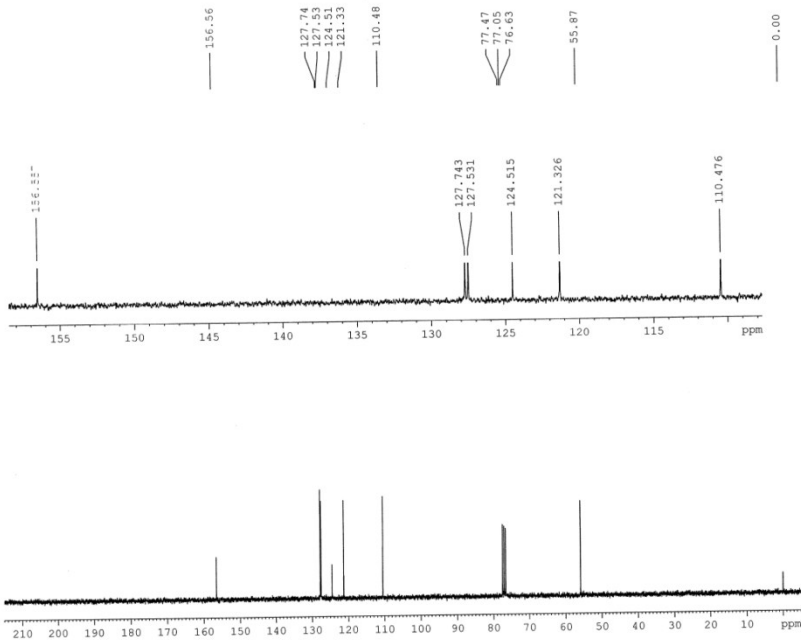

Table 3; Entry 8

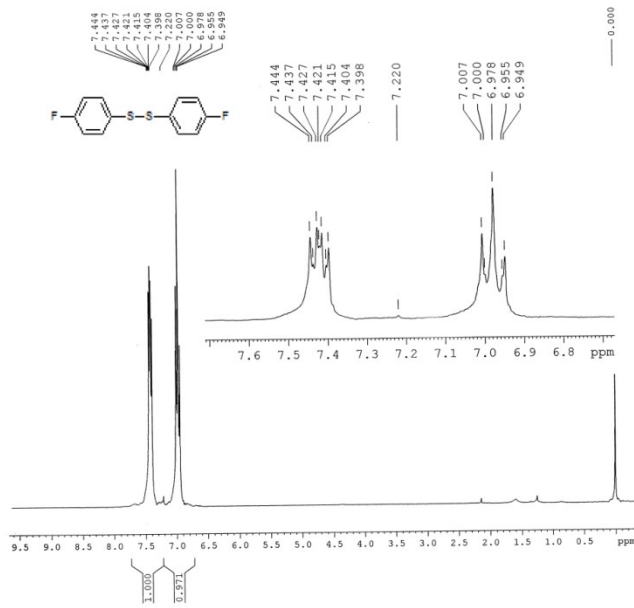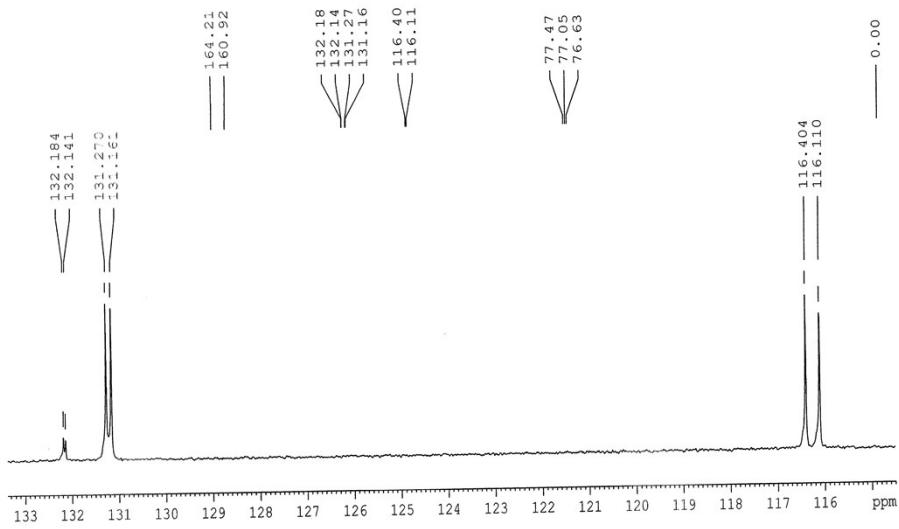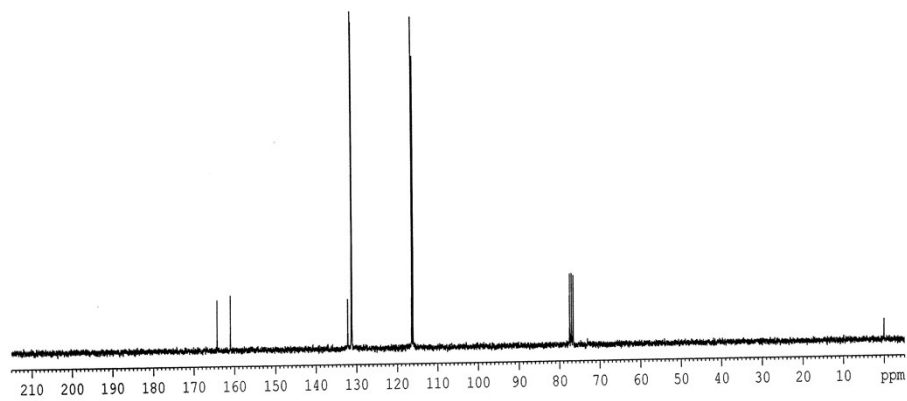

Table 3; Entry 9

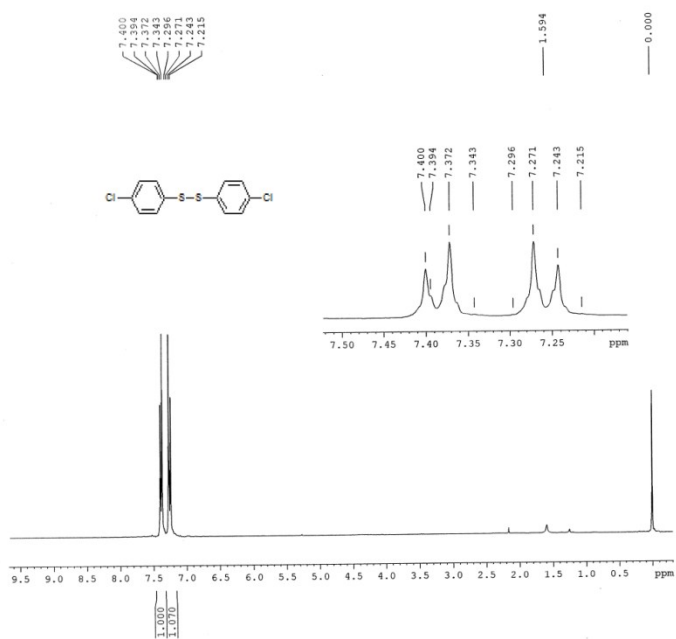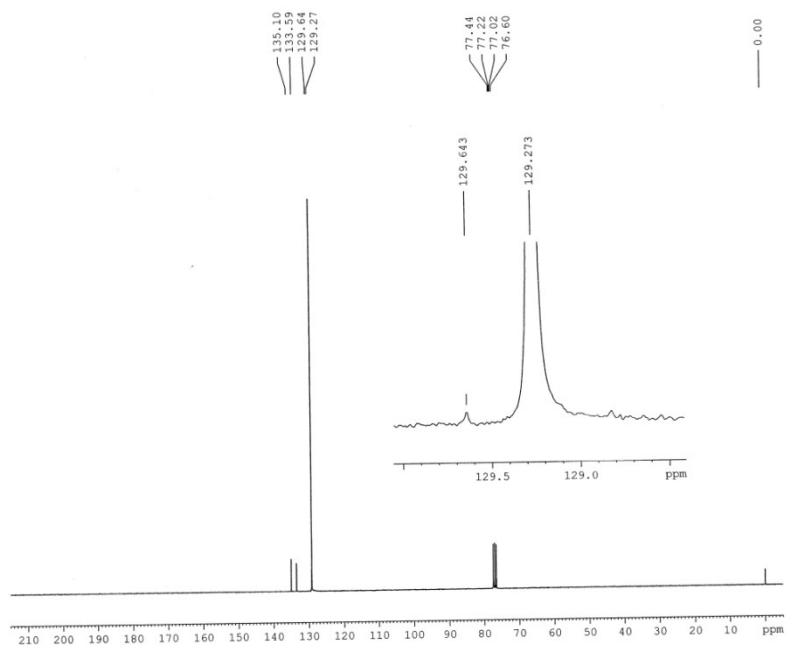

Table 3; Entry 12

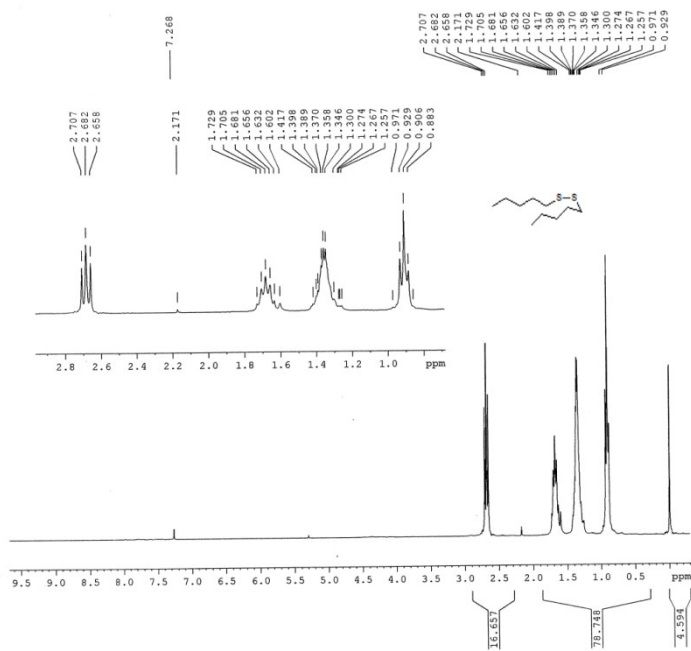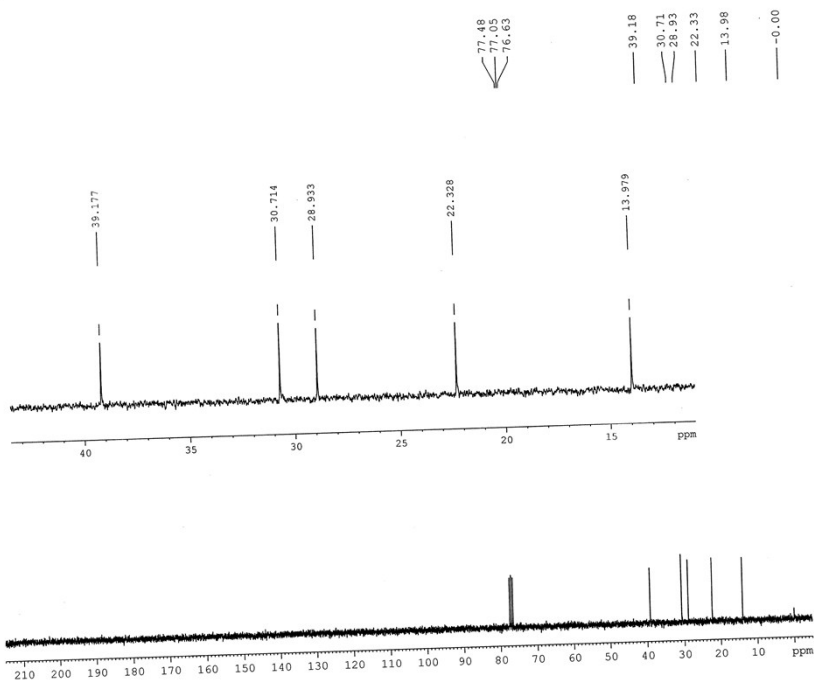

Table 3; Entry 13

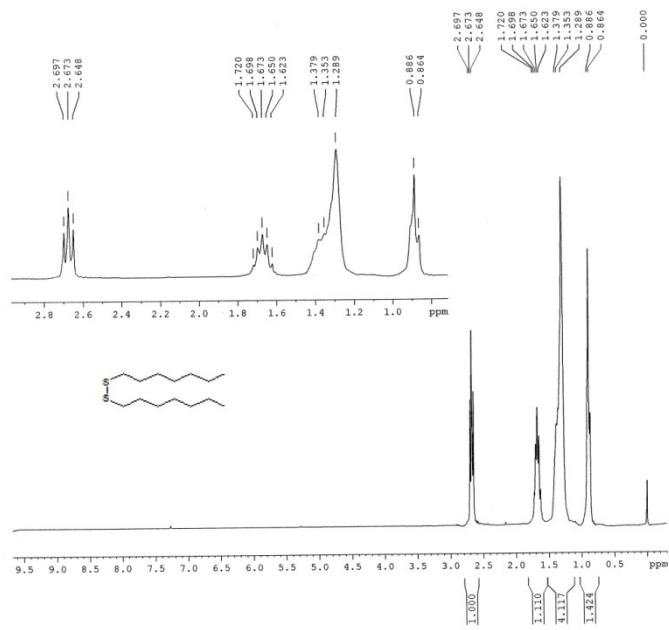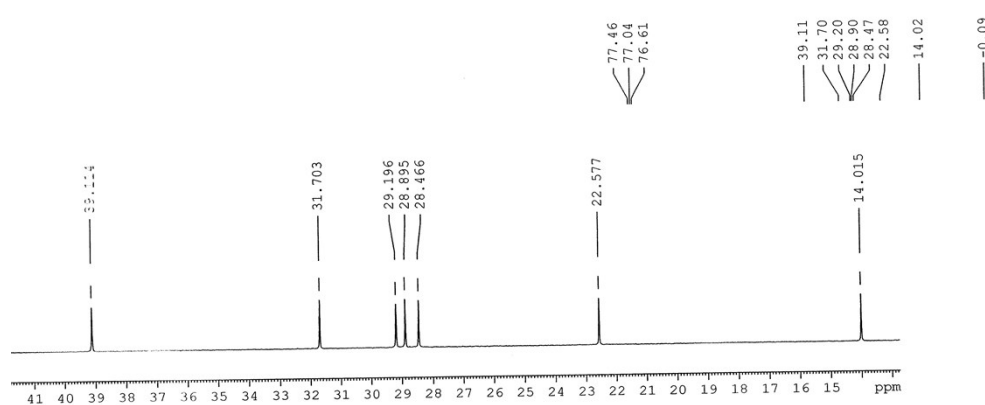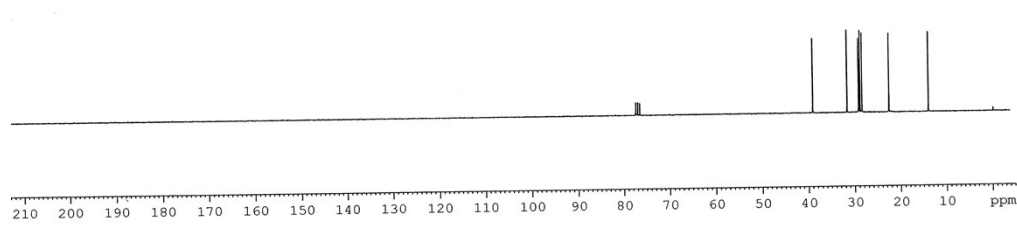



Table 3; Entry 14

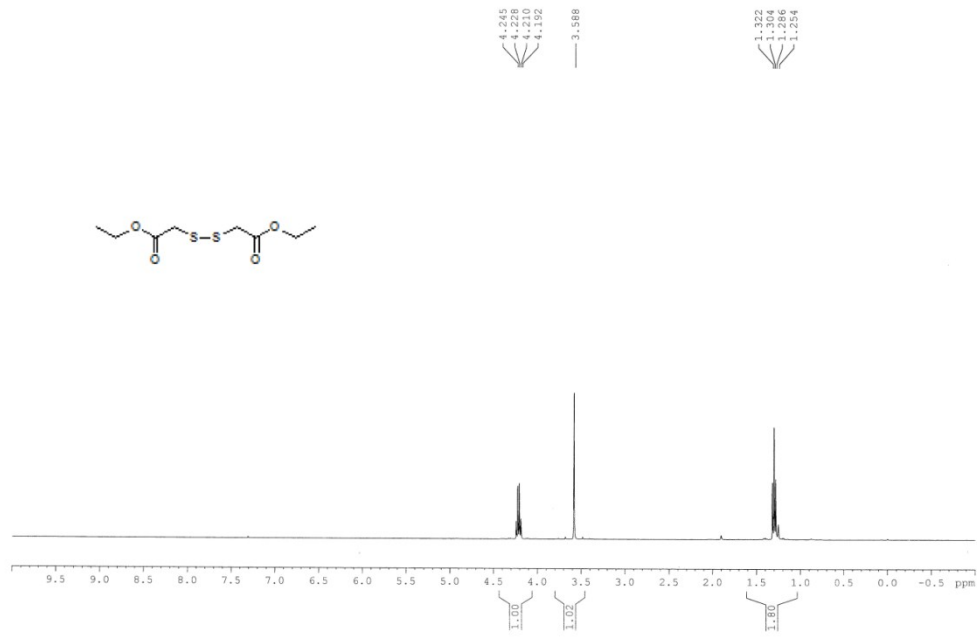

Supplement: c6ra19832e1.pdf [file c6ra19832e1.pdf]
